# Supplementary material for: The Complexities of “Minding the Gap”: Perceived Discrepancies Between Values and Behavior Affect Well-Being
Source: PubMed Central journal article supplement (PMC6465641; doi:10.3389/fpsyg.2019.00736), 2019-04-09
Supplement: Data_Sheet_1.pdf [file Data_Sheet_1.pdf]

## Appendix A

### Phase One Questions

Please finish the statements below with a reason/reasons why these behaviours are important for people in general to do. You are required to write at least 140 characters for each behaviour.

**Self-Transcendence.** It is important for people to support friends and family with everyday tasks, such as baby-sitting, because...

It is important for people to buy environmentally friendly products because...

It is important for people to help out friends and classmates at university because...

It is important for people to donate money to charity because...

It is important for people to give money to homeless people because...

It is important to speak out in favour of tolerance for those with different lifestyles because...

**Conservation.** It is important for people to keep their opinions to themselves in order to not disagree with others because...

It is important for people not to boast about their own achievements because...

It is important for people to change their passwords regularly because...

It is important for people to check the expiration date on products before buying or using them because...

It is important for people to attend dawn services on ANZAC Day because...

It is important for people to wait for the green light before crossing the street, even when no cars are coming, because...

**Self-Enhancement.** It is important for people to copy the behaviour of rich people because...

It is important for people to influence others to get what they want because...

It is important for people to insist that others do what they want them to do because...

It is important for people to show their wealth because...

It is important for people to study hard in order to get a good grade in a difficult course because...

It is important for people to try to impress their tutor/lecturer by doing more work than is expected of them because...

**Openness to Change.** It is important for people to act independently without consulting other people because...

- 31 It is important for people to change their routine regularly because...
- 32 It is important for people to treat themselves because...
- 33 It is important for people to learn something simply for the joy of learning because...
- 34 It is important for people to be spontaneous because...
- 35 It is important for people to keep informed on topics not related to their studies or profession
- 36 because...

37 **Phase Two Questions**

38 You will now be asked about your past engagement in certain behaviours. Please answer  
39 truthfully.

40 **Self-Transcendence.** How much time have you spent supporting friends and family with  
41 everyday tasks, such as baby-sitting, in the last 7 days?

- |         |         |         |        |        |        |        |         |         |
|---------|---------|---------|--------|--------|--------|--------|---------|---------|
| 0       | 1-30    | More    | More   | More   | More   | More   | More    | More    |
| minutes | minutes | than 30 | than 1 | than 2 | than 4 | than 7 | than 12 | than 20 |
|         |         | minutes | hour   | hours  | hours  | hours  | hours   | hours   |

42

43 How many times have you bought environmentally friendly products in the last 7 days?

- |         |      |       |       |       |       |       |       |       |
|---------|------|-------|-------|-------|-------|-------|-------|-------|
| None at | 1    | 2     | 3-5   | 6-8   | 9-11  | 12-14 | 15-17 | 18+   |
| all     | time | times | times | times | times | times | times | times |

44

45 How many times have you helped out friends and classmates at university in the last 7 days?

- |         |      |       |       |       |       |       |       |       |
|---------|------|-------|-------|-------|-------|-------|-------|-------|
| None at | 1    | 2     | 3-5   | 6-8   | 9-11  | 12-14 | 15-17 | 18+   |
| all     | time | times | times | times | times | times | times | times |

46

47 How many times have you spoken out in favour of tolerance for those with different lifestyles in  
48 the last 7 days?

- |         |      |       |       |       |       |       |       |       |
|---------|------|-------|-------|-------|-------|-------|-------|-------|
| None at | 1    | 2     | 3-5   | 6-8   | 9-11  | 12-14 | 15-17 | 18+   |
| all     | time | times | times | times | times | times | times | times |

49

50 How much money have you donated to charity in the last month?

- |     |         |          |           |           |           |           |       |       |
|-----|---------|----------|-----------|-----------|-----------|-----------|-------|-------|
| \$0 | 10c-\$1 | More     | More      | More      | More      | More      | More  | More  |
|     |         | than \$1 | than \$10 | than \$20 | than \$50 | than \$80 | than  | than  |
|     |         |          |           |           |           |           | \$110 | \$150 |

51

52

53 How much money have you given to homeless people in the last month?

|     |         |                  |                   |                   |                   |                   |                       |                       |
|-----|---------|------------------|-------------------|-------------------|-------------------|-------------------|-----------------------|-----------------------|
| \$0 | 10c-\$1 | More<br>than \$1 | More<br>than \$10 | More<br>than \$20 | More<br>than \$50 | More<br>than \$80 | More<br>than<br>\$110 | More<br>than<br>\$150 |
|-----|---------|------------------|-------------------|-------------------|-------------------|-------------------|-----------------------|-----------------------|

54

55 **Conservation.** How many times did you keep your opinion to yourself in order to not  
56 disagree with others yesterday?

|                |           |            |              |              |               |                |                |              |
|----------------|-----------|------------|--------------|--------------|---------------|----------------|----------------|--------------|
| None at<br>all | 1<br>time | 2<br>times | 3-5<br>times | 6-8<br>times | 9-11<br>times | 12-14<br>times | 15-17<br>times | 18+<br>times |
|----------------|-----------|------------|--------------|--------------|---------------|----------------|----------------|--------------|

57

58 How many times have you refrained from telling someone about your achievements in the last  
59 month?

|                |           |            |              |              |               |                |                |              |
|----------------|-----------|------------|--------------|--------------|---------------|----------------|----------------|--------------|
| None at<br>all | 1<br>time | 2<br>times | 3-5<br>times | 6-8<br>times | 9-11<br>times | 12-14<br>times | 15-17<br>times | 18+<br>times |
|----------------|-----------|------------|--------------|--------------|---------------|----------------|----------------|--------------|

60

61 How many times have you changed your passwords in the last year?

|                |           |            |              |              |               |                |                |              |
|----------------|-----------|------------|--------------|--------------|---------------|----------------|----------------|--------------|
| None at<br>all | 1<br>time | 2<br>times | 3-5<br>times | 6-8<br>times | 9-11<br>times | 12-14<br>times | 15-17<br>times | 18+<br>times |
|----------------|-----------|------------|--------------|--------------|---------------|----------------|----------------|--------------|

62

63 How many times have you checked the expiration date on products before buying or using them  
64 in the last 7 days?

|                |           |            |              |              |               |                |                |              |
|----------------|-----------|------------|--------------|--------------|---------------|----------------|----------------|--------------|
| None at<br>all | 1<br>time | 2<br>times | 3-5<br>times | 6-8<br>times | 9-11<br>times | 12-14<br>times | 15-17<br>times | 18+<br>times |
|----------------|-----------|------------|--------------|--------------|---------------|----------------|----------------|--------------|

65

66 How many times have you attended a dawn service for ANZAC Day in the last 10 years?

|                |           |            |            |            |            |            |              |               |
|----------------|-----------|------------|------------|------------|------------|------------|--------------|---------------|
| None at<br>all | 1<br>time | 2<br>times | 3<br>times | 4<br>times | 5<br>times | 6<br>times | 7-8<br>times | 9-10<br>times |
|----------------|-----------|------------|------------|------------|------------|------------|--------------|---------------|

67

68 How many times have you waited for the green light before crossing the street, even when no  
69 cars were coming, in the last 3 days?

|                |              |              |               |                |                |                |                |              |
|----------------|--------------|--------------|---------------|----------------|----------------|----------------|----------------|--------------|
| None at<br>all | 1-3<br>times | 4-6<br>times | 7-10<br>times | 11-14<br>times | 15-19<br>times | 20-24<br>times | 25-29<br>times | 30+<br>times |
|----------------|--------------|--------------|---------------|----------------|----------------|----------------|----------------|--------------|

70

71 **Self-Enhancement.** How many times have you tried to impress your tutor/lecturer by  
 72 taking on more work this year?

|                |           |            |              |              |               |                |                |              |
|----------------|-----------|------------|--------------|--------------|---------------|----------------|----------------|--------------|
| None at<br>all | 1<br>time | 2<br>times | 3-5<br>times | 6-8<br>times | 9-11<br>times | 12-14<br>times | 15-17<br>times | 18+<br>times |
|----------------|-----------|------------|--------------|--------------|---------------|----------------|----------------|--------------|

73

74 How many times have you copied the behaviour of rich people in the last 7 days?

|                |           |            |              |              |               |                |                |              |
|----------------|-----------|------------|--------------|--------------|---------------|----------------|----------------|--------------|
| None at<br>all | 1<br>time | 2<br>times | 3-5<br>times | 6-8<br>times | 9-11<br>times | 12-14<br>times | 15-17<br>times | 18+<br>times |
|----------------|-----------|------------|--------------|--------------|---------------|----------------|----------------|--------------|

75

76 How many times have you influenced others to get what you want in the last 7 days?

|                |           |            |              |              |               |                |                |              |
|----------------|-----------|------------|--------------|--------------|---------------|----------------|----------------|--------------|
| None at<br>all | 1<br>time | 2<br>times | 3-5<br>times | 6-8<br>times | 9-11<br>times | 12-14<br>times | 15-17<br>times | 18+<br>times |
|----------------|-----------|------------|--------------|--------------|---------------|----------------|----------------|--------------|

77

78 How many times have you insisted that others do what you want them to do in the last 7 days?

|                |           |            |              |              |               |                |                |              |
|----------------|-----------|------------|--------------|--------------|---------------|----------------|----------------|--------------|
| None at<br>all | 1<br>time | 2<br>times | 3-5<br>times | 6-8<br>times | 9-11<br>times | 12-14<br>times | 15-17<br>times | 18+<br>times |
|----------------|-----------|------------|--------------|--------------|---------------|----------------|----------------|--------------|

79

80 How many times have you shown your wealth in the last 7 days?

|                |           |            |              |              |               |                |                |              |
|----------------|-----------|------------|--------------|--------------|---------------|----------------|----------------|--------------|
| None at<br>all | 1<br>time | 2<br>times | 3-5<br>times | 6-8<br>times | 9-11<br>times | 12-14<br>times | 15-17<br>times | 18+<br>times |
|----------------|-----------|------------|--------------|--------------|---------------|----------------|----------------|--------------|

81

82 How much time have you spent studying in order to get a good grade in a difficult course in the  
 83 last 7 days?

|              |                 |                            |                        |                         |                         |                         |                          |                          |
|--------------|-----------------|----------------------------|------------------------|-------------------------|-------------------------|-------------------------|--------------------------|--------------------------|
| 0<br>minutes | 1-30<br>minutes | More<br>than 30<br>minutes | More<br>than 1<br>hour | More<br>than 2<br>hours | More<br>than 4<br>hours | More<br>than 7<br>hours | More<br>than 12<br>hours | More<br>than 20<br>hours |
|--------------|-----------------|----------------------------|------------------------|-------------------------|-------------------------|-------------------------|--------------------------|--------------------------|

84

85 **Openness to Change.** How many times have you acted independently without consulting  
 86 other people in the last 7 days?

|                |           |            |              |              |               |                |                |              |
|----------------|-----------|------------|--------------|--------------|---------------|----------------|----------------|--------------|
| None at<br>all | 1<br>time | 2<br>times | 3-5<br>times | 6-8<br>times | 9-11<br>times | 12-14<br>times | 15-17<br>times | 18+<br>times |
|----------------|-----------|------------|--------------|--------------|---------------|----------------|----------------|--------------|

87

88 How many times have you changed your routine in the last month?

|                |           |            |              |              |               |                |                |              |
|----------------|-----------|------------|--------------|--------------|---------------|----------------|----------------|--------------|
| None at<br>all | 1<br>time | 2<br>times | 3-5<br>times | 6-8<br>times | 9-11<br>times | 12-14<br>times | 15-17<br>times | 18+<br>times |
|----------------|-----------|------------|--------------|--------------|---------------|----------------|----------------|--------------|

89

90 How many times have you learnt something simply for the joy of learning in the last 7 days?

|                |           |            |              |              |               |                |                |              |
|----------------|-----------|------------|--------------|--------------|---------------|----------------|----------------|--------------|
| None at<br>all | 1<br>time | 2<br>times | 3-5<br>times | 6-8<br>times | 9-11<br>times | 12-14<br>times | 15-17<br>times | 18+<br>times |
|----------------|-----------|------------|--------------|--------------|---------------|----------------|----------------|--------------|

91

92 How many times have you treated yourself in the last 7 days?

|                |           |            |              |              |               |                |                |              |
|----------------|-----------|------------|--------------|--------------|---------------|----------------|----------------|--------------|
| None at<br>all | 1<br>time | 2<br>times | 3-5<br>times | 6-8<br>times | 9-11<br>times | 12-14<br>times | 15-17<br>times | 18+<br>times |
|----------------|-----------|------------|--------------|--------------|---------------|----------------|----------------|--------------|

93

94 How many times have you been spontaneous in the last 7 days?

|                |           |            |              |              |               |                |                |              |
|----------------|-----------|------------|--------------|--------------|---------------|----------------|----------------|--------------|
| None at<br>all | 1<br>time | 2<br>times | 3-5<br>times | 6-8<br>times | 9-11<br>times | 12-14<br>times | 15-17<br>times | 18+<br>times |
|----------------|-----------|------------|--------------|--------------|---------------|----------------|----------------|--------------|

95

96 How many times have you kept informed on topics not related to your studies or profession in  
97 the last 7 days?

|                |           |            |              |              |               |                |                |              |
|----------------|-----------|------------|--------------|--------------|---------------|----------------|----------------|--------------|
| None at<br>all | 1<br>time | 2<br>times | 3-5<br>times | 6-8<br>times | 9-11<br>times | 12-14<br>times | 15-17<br>times | 18+<br>times |
|----------------|-----------|------------|--------------|--------------|---------------|----------------|----------------|--------------|

98

99 **Control.** How many times have you chatted to someone before a lecture in the last 7  
100 days?

|                |              |              |              |              |               |                |                |              |
|----------------|--------------|--------------|--------------|--------------|---------------|----------------|----------------|--------------|
| None at<br>all | 1-2<br>times | 3-4<br>times | 5-6<br>times | 7-8<br>times | 9-10<br>times | 11-12<br>times | 13-14<br>times | 15+<br>times |
|----------------|--------------|--------------|--------------|--------------|---------------|----------------|----------------|--------------|

101

102 How many times have you Googled something in the last 3 days?

|                |              |               |                |                |                |                |                |              |
|----------------|--------------|---------------|----------------|----------------|----------------|----------------|----------------|--------------|
| None at<br>all | 1-5<br>times | 6-10<br>times | 11-20<br>times | 21-30<br>times | 31-40<br>times | 41-50<br>times | 51-60<br>times | 61+<br>times |
|----------------|--------------|---------------|----------------|----------------|----------------|----------------|----------------|--------------|

103

104 How many times have you used your phone to call someone or answer a call in the last 7 days?

|                |              |              |              |              |               |                |                |              |
|----------------|--------------|--------------|--------------|--------------|---------------|----------------|----------------|--------------|
| None at<br>all | 1-2<br>times | 3-4<br>times | 5-6<br>times | 7-8<br>times | 9-10<br>times | 11-12<br>times | 13-14<br>times | 15+<br>times |
|----------------|--------------|--------------|--------------|--------------|---------------|----------------|----------------|--------------|

105

106 How many times have you used the Info Ihonui in the last month?

|                |           |            |            |            |            |            |            |             |
|----------------|-----------|------------|------------|------------|------------|------------|------------|-------------|
| None at<br>all | 1<br>time | 2<br>times | 3<br>times | 4<br>times | 5<br>times | 6<br>times | 7<br>times | 8+<br>times |
|----------------|-----------|------------|------------|------------|------------|------------|------------|-------------|

107

108 How many times have you used a computer at one of the VUW libraries in the last 7 days?

|                |              |              |              |              |               |                |                |              |
|----------------|--------------|--------------|--------------|--------------|---------------|----------------|----------------|--------------|
| None at<br>all | 1-2<br>times | 3-4<br>times | 5-6<br>times | 7-8<br>times | 9-10<br>times | 11-12<br>times | 13-14<br>times | 15+<br>times |
|----------------|--------------|--------------|--------------|--------------|---------------|----------------|----------------|--------------|

109

110 How many times have you visited a news website in the last 7 days?

|                |              |              |              |                |                |                |                |              |
|----------------|--------------|--------------|--------------|----------------|----------------|----------------|----------------|--------------|
| None at<br>all | 1-3<br>times | 4-6<br>times | 7-9<br>times | 10-12<br>times | 13-15<br>times | 16-18<br>times | 19-21<br>times | 22+<br>times |
|----------------|--------------|--------------|--------------|----------------|----------------|----------------|----------------|--------------|

111 **Phase Three Questions**

112 You will now be asked about how you think you *should* have behaved in the past. Please answer  
113 truthfully.

114

115 **Self-Transcendence.** In the last 7 days, how many times do you think you *should* have  
116 bought environmentally friendly products?

|                                               |    |    |    |                                             |   |   |   |                                              |
|-----------------------------------------------|----|----|----|---------------------------------------------|---|---|---|----------------------------------------------|
| A lot<br>less<br>often<br>than I<br>did<br>-4 | -3 | -2 | -1 | The<br>same<br>amount<br>that I<br>did<br>0 | 1 | 2 | 3 | A lot<br>more<br>often<br>than I<br>did<br>4 |
|-----------------------------------------------|----|----|----|---------------------------------------------|---|---|---|----------------------------------------------|

117 In the last 7 days, how many times do you think you *should* have helped out friends and  
118 classmates at university?

|                                               |    |    |    |                                             |   |   |   |                                              |
|-----------------------------------------------|----|----|----|---------------------------------------------|---|---|---|----------------------------------------------|
| A lot<br>less<br>often<br>than I<br>did<br>-4 | -3 | -2 | -1 | The<br>same<br>amount<br>that I<br>did<br>0 | 1 | 2 | 3 | A lot<br>more<br>often<br>than I<br>did<br>4 |
|-----------------------------------------------|----|----|----|---------------------------------------------|---|---|---|----------------------------------------------|

119 In the last 7 days, how many times do you think you *should* have bought environmentally  
120 friendly products?

|                                               |    |    |    |                                             |   |   |   |                                              |
|-----------------------------------------------|----|----|----|---------------------------------------------|---|---|---|----------------------------------------------|
| A lot<br>less<br>often<br>than I<br>did<br>-4 | -3 | -2 | -1 | The<br>same<br>amount<br>that I<br>did<br>0 | 1 | 2 | 3 | A lot<br>more<br>often<br>than I<br>did<br>4 |
|-----------------------------------------------|----|----|----|---------------------------------------------|---|---|---|----------------------------------------------|

121 In the last 7 days, how many times do you think you *should* have spoken out in favour of  
 122 tolerance for those with different lifestyles?

|                             |    |    |    |                            |   |   |   |                             |
|-----------------------------|----|----|----|----------------------------|---|---|---|-----------------------------|
| A lot less often than I did | -3 | -2 | -1 | The same amount that I did | 1 | 2 | 3 | A lot more often than I did |
| -4                          |    |    |    | 0                          |   |   |   | 4                           |

123 In the past month, how much money do you think you *should* have donated to charity?

|                             |    |    |    |                                     |   |   |   |                             |
|-----------------------------|----|----|----|-------------------------------------|---|---|---|-----------------------------|
| A lot less money than I did | -3 | -2 | -1 | The same amount of money that I did | 1 | 2 | 3 | A lot more money than I did |
| -4                          |    |    |    | 0                                   |   |   |   | 4                           |

124 In the past month, how much money do you think you *should* have given to homeless people?

|                             |    |    |    |                                     |   |   |   |                             |
|-----------------------------|----|----|----|-------------------------------------|---|---|---|-----------------------------|
| A lot less money than I did | -3 | -2 | -1 | The same amount of money that I did | 1 | 2 | 3 | A lot more money than I did |
| -4                          |    |    |    | 0                                   |   |   |   | 4                           |

125 **Conservation.** How many times do you think you *should* have kept your opinion to  
 126 yourself in order to not disagree with others yesterday?

|                             |    |    |    |                            |   |   |   |                             |
|-----------------------------|----|----|----|----------------------------|---|---|---|-----------------------------|
| A lot less often than I did | -3 | -2 | -1 | The same amount that I did | 1 | 2 | 3 | A lot more often than I did |
| -4                          |    |    |    | 0                          |   |   |   | 4                           |

127

128 In the past month, how many times do you think you *should* have refrained from telling someone  
 129 about your achievements?

|                  |    |    |    |                 |   |   |   |                  |
|------------------|----|----|----|-----------------|---|---|---|------------------|
| A lot less often | -3 | -2 | -1 | The same amount | 1 | 2 | 3 | A lot more often |
|------------------|----|----|----|-----------------|---|---|---|------------------|

|                     |  |  |  |                    |  |  |  |                    |
|---------------------|--|--|--|--------------------|--|--|--|--------------------|
| than I<br>did<br>-4 |  |  |  | that I<br>did<br>0 |  |  |  | than I<br>did<br>4 |
|---------------------|--|--|--|--------------------|--|--|--|--------------------|

130 In the last year, how many times do you think you *should* have changed your passwords?

|                                               |    |    |    |                                             |   |   |   |                                              |
|-----------------------------------------------|----|----|----|---------------------------------------------|---|---|---|----------------------------------------------|
| A lot<br>less<br>often<br>than I<br>did<br>-4 | -3 | -2 | -1 | The<br>same<br>amount<br>that I<br>did<br>0 | 1 | 2 | 3 | A lot<br>more<br>often<br>than I<br>did<br>4 |
|-----------------------------------------------|----|----|----|---------------------------------------------|---|---|---|----------------------------------------------|

131 In the last 7 days, how many times do you think you *should* have checked the expiration date  
132 on products before buying or using them?

|                                               |    |    |    |                                             |   |   |   |                                              |
|-----------------------------------------------|----|----|----|---------------------------------------------|---|---|---|----------------------------------------------|
| A lot<br>less<br>often<br>than I<br>did<br>-4 | -3 | -2 | -1 | The<br>same<br>amount<br>that I<br>did<br>0 | 1 | 2 | 3 | A lot<br>more<br>often<br>than I<br>did<br>4 |
|-----------------------------------------------|----|----|----|---------------------------------------------|---|---|---|----------------------------------------------|

133 In the last 10 years, how many times do you think you *should* have attended dawn services on  
134 ANZAC Day?

|                                               |    |    |    |                                             |   |   |   |                                              |
|-----------------------------------------------|----|----|----|---------------------------------------------|---|---|---|----------------------------------------------|
| A lot<br>less<br>often<br>than I<br>did<br>-4 | -3 | -2 | -1 | The<br>same<br>amount<br>that I<br>did<br>0 | 1 | 2 | 3 | A lot<br>more<br>often<br>than I<br>did<br>4 |
|-----------------------------------------------|----|----|----|---------------------------------------------|---|---|---|----------------------------------------------|

135 **Self-Enhancement.** In the past month, how many times do you think you *should* have  
136 tried to impress your tutor/lecturer by taking on more work?

|                                               |    |    |    |                                             |   |   |   |                                              |
|-----------------------------------------------|----|----|----|---------------------------------------------|---|---|---|----------------------------------------------|
| A lot<br>less<br>often<br>than I<br>did<br>-4 | -3 | -2 | -1 | The<br>same<br>amount<br>that I<br>did<br>0 | 1 | 2 | 3 | A lot<br>more<br>often<br>than I<br>did<br>4 |
|-----------------------------------------------|----|----|----|---------------------------------------------|---|---|---|----------------------------------------------|

137

138 In the last 7 days, how many times do you think you *should* have copied the behaviour of rich  
139 people?

|                        |    |    |    |                       |   |   |   |                        |
|------------------------|----|----|----|-----------------------|---|---|---|------------------------|
| A lot<br>less<br>often | -3 | -2 | -1 | The<br>same<br>amount | 1 | 2 | 3 | A lot<br>more<br>often |
|------------------------|----|----|----|-----------------------|---|---|---|------------------------|



|                     |  |  |  |                    |  |  |  |                    |
|---------------------|--|--|--|--------------------|--|--|--|--------------------|
| than I<br>did<br>-4 |  |  |  | that I<br>did<br>0 |  |  |  | than I<br>did<br>4 |
|---------------------|--|--|--|--------------------|--|--|--|--------------------|

140 In the last 7 days, how many times do you think you *should* have influenced others to get what  
141 you wanted?

|                                               |    |    |    |                                             |   |   |   |                                              |
|-----------------------------------------------|----|----|----|---------------------------------------------|---|---|---|----------------------------------------------|
| A lot<br>less<br>often<br>than I<br>did<br>-4 | -3 | -2 | -1 | The<br>same<br>amount<br>that I<br>did<br>0 | 1 | 2 | 3 | A lot<br>more<br>often<br>than I<br>did<br>4 |
|-----------------------------------------------|----|----|----|---------------------------------------------|---|---|---|----------------------------------------------|

142 In the last 7 days, how many times do you think you *should* have insisted that others do what  
143 you wanted them to do?

|                                               |    |    |    |                                             |   |   |   |                                              |
|-----------------------------------------------|----|----|----|---------------------------------------------|---|---|---|----------------------------------------------|
| A lot<br>less<br>often<br>than I<br>did<br>-4 | -3 | -2 | -1 | The<br>same<br>amount<br>that I<br>did<br>0 | 1 | 2 | 3 | A lot<br>more<br>often<br>than I<br>did<br>4 |
|-----------------------------------------------|----|----|----|---------------------------------------------|---|---|---|----------------------------------------------|

144 In the last 7 days, how many times do you think you *should* have shown your wealth?

|                                               |    |    |    |                                             |   |   |   |                                              |
|-----------------------------------------------|----|----|----|---------------------------------------------|---|---|---|----------------------------------------------|
| A lot<br>less<br>often<br>than I<br>did<br>-4 | -3 | -2 | -1 | The<br>same<br>amount<br>that I<br>did<br>0 | 1 | 2 | 3 | A lot<br>more<br>often<br>than I<br>did<br>4 |
|-----------------------------------------------|----|----|----|---------------------------------------------|---|---|---|----------------------------------------------|

145 In the last 7 days, how much time do you think you *should* have spent studying in order to get a  
146 good grade in a difficult test/assignment?

|                                               |    |    |    |                                             |   |   |   |                                              |
|-----------------------------------------------|----|----|----|---------------------------------------------|---|---|---|----------------------------------------------|
| A lot<br>less<br>often<br>than I<br>did<br>-4 | -3 | -2 | -1 | The<br>same<br>amount<br>that I<br>did<br>0 | 1 | 2 | 3 | A lot<br>more<br>often<br>than I<br>did<br>4 |
|-----------------------------------------------|----|----|----|---------------------------------------------|---|---|---|----------------------------------------------|

147 **Openness to Change.** In the last 7 days, how many times do you think you *should* have  
148 acted independently without consulting other people?

|                                         |    |    |    |                                        |   |   |   |                                         |
|-----------------------------------------|----|----|----|----------------------------------------|---|---|---|-----------------------------------------|
| A lot<br>less<br>often<br>than I<br>did | -3 | -2 | -1 | The<br>same<br>amount<br>that I<br>did | 1 | 2 | 3 | A lot<br>more<br>often<br>than I<br>did |
|-----------------------------------------|----|----|----|----------------------------------------|---|---|---|-----------------------------------------|

|     | -4                                                                                                                                        |    |    |    | 0                          |   |   |   | 4                           |
|-----|-------------------------------------------------------------------------------------------------------------------------------------------|----|----|----|----------------------------|---|---|---|-----------------------------|
| 149 | In the past month, how many times do you think you <i>should</i> have changed your routine?                                               |    |    |    |                            |   |   |   |                             |
|     | A lot less often than I did                                                                                                               | -3 | -2 | -1 | The same amount that I did | 1 | 2 | 3 | A lot more often than I did |
|     | -4                                                                                                                                        |    |    |    | 0                          |   |   |   | 4                           |
| 150 | In the last 7 days, how many times do you think you <i>should</i> have learnt something simply for the joy of learning?                   |    |    |    |                            |   |   |   |                             |
| 151 | A lot less often than I did                                                                                                               | -3 | -2 | -1 | The same amount that I did | 1 | 2 | 3 | A lot more often than I did |
|     | -4                                                                                                                                        |    |    |    | 0                          |   |   |   | 4                           |
| 152 | In the last 7 days, how many times do you think you <i>should</i> have treated yourself?                                                  |    |    |    |                            |   |   |   |                             |
|     | A lot less often than I did                                                                                                               | -3 | -2 | -1 | The same amount that I did | 1 | 2 | 3 | A lot more often than I did |
|     | -4                                                                                                                                        |    |    |    | 0                          |   |   |   | 4                           |
| 153 | In the last 7 days, how many times do you think you <i>should</i> have been spontaneous?                                                  |    |    |    |                            |   |   |   |                             |
|     | A lot less often than I did                                                                                                               | -3 | -2 | -1 | The same amount that I did | 1 | 2 | 3 | A lot more often than I did |
|     | -4                                                                                                                                        |    |    |    | 0                          |   |   |   | 4                           |
| 154 |                                                                                                                                           |    |    |    |                            |   |   |   |                             |
| 155 | In the last 7 days, how many times do you think you <i>should</i> have kept informed on topics not related to your studies or profession? |    |    |    |                            |   |   |   |                             |
| 156 | A lot less often than I did                                                                                                               | -3 | -2 | -1 | The same amount that I did | 1 | 2 | 3 | A lot more often than I did |
|     | -4                                                                                                                                        |    |    |    | 0                          |   |   |   | 4                           |

157 **Control.** How many times do you think you *should* have chatted to someone before a  
 158 lecture in the last 7 days?

|                             |    |    |    |                            |   |   |   |                             |
|-----------------------------|----|----|----|----------------------------|---|---|---|-----------------------------|
| A lot less often than I did | -3 | -2 | -1 | The same amount that I did | 1 | 2 | 3 | A lot more often than I did |
| -4                          |    |    |    | 0                          |   |   |   | 4                           |

159 How many times do you think you *should* have Googled something in the last 3 days?

|                             |    |    |    |                            |   |   |   |                             |
|-----------------------------|----|----|----|----------------------------|---|---|---|-----------------------------|
| A lot less often than I did | -3 | -2 | -1 | The same amount that I did | 1 | 2 | 3 | A lot more often than I did |
| -4                          |    |    |    | 0                          |   |   |   | 4                           |

160 How many times do you think you *should* have used your phone to call someone or answer a call  
 161 in the last 7 days?

|                             |    |    |    |                            |   |   |   |                             |
|-----------------------------|----|----|----|----------------------------|---|---|---|-----------------------------|
| A lot less often than I did | -3 | -2 | -1 | The same amount that I did | 1 | 2 | 3 | A lot more often than I did |
| -4                          |    |    |    | 0                          |   |   |   | 4                           |

162 How many times do you think you *should* have used the Info Ihonui in the last month?

|                             |    |    |    |                            |   |   |   |                             |
|-----------------------------|----|----|----|----------------------------|---|---|---|-----------------------------|
| A lot less often than I did | -3 | -2 | -1 | The same amount that I did | 1 | 2 | 3 | A lot more often than I did |
| -4                          |    |    |    | 0                          |   |   |   | 4                           |

163

164 How many times do you think you *should* have used a computer at one of the VUW libraries in  
 165 the last 7 days?

|                             |    |    |    |                            |   |   |   |                             |
|-----------------------------|----|----|----|----------------------------|---|---|---|-----------------------------|
| A lot less often than I did | -3 | -2 | -1 | The same amount that I did | 1 | 2 | 3 | A lot more often than I did |
| -4                          |    |    |    | 0                          |   |   |   | 4                           |

166 How many times do you think you *should* have visited a news website in the last 7 days?

|                                               |    |    |    |                                             |   |   |   |                                              |
|-----------------------------------------------|----|----|----|---------------------------------------------|---|---|---|----------------------------------------------|
| A lot<br>less<br>often<br>than I<br>did<br>-4 | -3 | -2 | -1 | The<br>same<br>amount<br>that I<br>did<br>0 | 1 | 2 | 3 | A lot<br>more<br>often<br>than I<br>did<br>4 |
|-----------------------------------------------|----|----|----|---------------------------------------------|---|---|---|----------------------------------------------|

167

168

**Appendix B**

Table A1. *Task descriptions and examples for each survey component for each condition*

|                                         | Control                                                                                             | Self-Enhancement                                                                                    | Self-Transcendence                                                                                  | Conservation                                                                                        | Openness to Change                                                                                  |
|-----------------------------------------|-----------------------------------------------------------------------------------------------------|-----------------------------------------------------------------------------------------------------|-----------------------------------------------------------------------------------------------------|-----------------------------------------------------------------------------------------------------|-----------------------------------------------------------------------------------------------------|
| Personal values                         | 50% of all participants complete PVQ-RR first                                                       |                                                                                                     |                                                                                                     |                                                                                                     |                                                                                                     |
| Phase 1 Sentence completion description | Respond to 6 sentence prompts for random selection of behaviors from each value condition.          | Respond to 6 sentence prompts for behaviors expressive of self-enhancement.                         | Respond to 6 sentence prompts for behaviors expressive of self-transcendence                        | Respond to 6 sentence prompts for behaviors expressive of conservation                              | Respond to 6 sentence prompts for behaviors expressive of openness to change                        |
| Phase 1 Example item                    | “It is important for people to show their wealth because...”                                        | “It is important for people to show their wealth because...”                                        | “It is important for people to donate money to charity because...”                                  | “It is important for people to change their passwords regularly because...”                         | “It is important for people to treat themselves because...”                                         |
| Phase 2 Past behaviour description      | Report extent of completed neutral behaviors on unstretched scales                                  | Report extent of completed behaviors expressive of self-enhancement on stretched scales             | Report extent of completed behaviors expressive of self-transcendence on stretched scales           | Report extent of completed behaviors expressive of conservation on stretched scales                 | Report extent of completed behaviors expressive of openness to change on stretched scales           |
| Phase 2 Example item                    | “How many times have you Googled something in the last 3 days?”                                     | “How many times have you shown your wealth in the last 7 days?”                                     | “How much money have you donated to charity in the last month?”                                     | “How many times have you changed your passwords in the last year?”                                  | “How many times have you treated yourself in the last 7 days?”                                      |
| Phase 3 Behavioral gap description      | Participants report how much they think they should have completed behaviors asked about previously | Participants report how much they think they should have completed behaviors asked about previously | Participants report how much they think they should have completed behaviors asked about previously | Participants report how much they think they should have completed behaviors asked about previously | Participants report how much they think they should have completed behaviors asked about previously |
| Phase 3 Example item                    | “How many times do you think you <i>should</i> have Googled something in the last 3 days?”          | “In the last 7 days, how many times do you think you <i>should</i> have shown your wealth?”         | “In the past month, how much money do you think you <i>should</i> have donated to charity?”         | “In the last year, how many times do you think you <i>should</i> have changed your passwords?”      | “In the last 7 days, how many times do you think you <i>should</i> have treated yourself?”          |
| Well-being measures                     | All participants complete measures of various aspects of well-being.                                |                                                                                                     |                                                                                                     |                                                                                                     |                                                                                                     |
| Personal values                         | 50% of all participants complete PVQ-RR last                                                        |                                                                                                     |                                                                                                     |                                                                                                     |                                                                                                     |

170

**Appendix C****171 Shortened PVQ**

172 Here we briefly describe different people. Please read each description and think about how  
173 much that person is or is not like you. Choose an answer that shows how much the person  
174 described is like you. [Items are rated from *Not like me at all*, *Not like me*, *A little like me*,  
175 *Moderately like me*, *Like me*, *Very much like me*]

176 It is important to them to be free to choose what they do by themselves. [OtC]

177 It is important to them that everyone be treated justly, even people they don't know. [ST]

178 It is important to them to have all sorts of new experiences. [OtC]

179 It is important to them to be the one who tells others what to do. [SE]

180 It is important to them to figure things out themselves. [OtC]

181 It is important to them to enjoy life's pleasures. [OtC]

182 It is important to them to follow rules even when no-one is watching. [CONS]

183 It is important to them to be very successful. [SE]

184 It is very important to them to help the people dear to them. [ST]

185 It is important to them to be personally safe and secure. [CONS]

186 It is important to them to be a dependable and trustworthy friend. [ST]

187 It is important to them to be wealthy. [SE]

188 It is important to them to maintain traditional values and ways of thinking. [CONS]

189 It is important to them to be tolerant toward all kinds of people and groups. [ST]

190 It is important to them to care for nature. [ST]

191 It is important to them to avoid upsetting other people. [CONS]

192 It is important to them that their country is secure and stable. [CONS]

193 It is important to them to be humble. [CONS]

194 It is important to them to protect their public image. [CONS]

195

## Appendix D

Table A2

*The Main and Interaction Effects of Condition and Personal Values on Behavioral Gap*

|                                | Estimate | Standard error | T value | P value |
|--------------------------------|----------|----------------|---------|---------|
| (Intercept)                    | .33      | 1.23           | .27     | .79     |
| Condition CONS                 | 1.52     | 1.67           | .91     | .37     |
| Condition SE                   | -1.10    | 1.84           | -.60    | .55     |
| Condition ST                   | -3.01    | 2.09           | -1.44   | .15     |
| Condition OTC                  | -.16     | 1.72           | -.10    | .93     |
| PVQ-RR CONS                    | -.05     | .19            | -.26    | .80     |
| PVQ-RR OTC                     | -.08     | .23            | -.33    | .74     |
| PVQ-RR SE                      | -.07     | .15            | -.45    | .65     |
| PVQ-RR ST                      | .20      | .27            | .74     | .46     |
| Condition CONS:<br>PVQ-RR CONS | -.13     | .29            | -.43    | .67     |
| Condition SE:<br>PVQ-RR CONS   | .04      | .33            | .11     | .91     |
| Condition ST:<br>PVQ-RR CONS   | .28      | .31            | .89     | .37     |
| Condition OTC:<br>PVQ-RR CONS  | .04      | .40            | .11     | .92     |
| Condition CONS:<br>PVQ-RR OTC  | -.08     | .35            | -.24    | .81     |
| Condition SE:<br>PVQ-RR OTC    | -.18     | .33            | -.55    | .59     |
| Condition ST:<br>PVQ-RR OTC    | -.03     | .36            | -.08    | .94     |
| Condition OTC:<br>PVQ-RR OTC   | .16      | .37            | .42     | .67     |
| Condition CONS:<br>PVQ-RR SE   | .22      | .22            | .99     | .32     |
| Condition SE:<br>PVQ-RR SE     | .13      | .24            | .56     | .58     |
| Condition ST:<br>PVQ-RR SE     | .23      | .25            | .90     | .37     |
| Condition OTC:<br>PVQ-RR SE    | .44      | .30            | 1.46    | .15     |
| Condition CONS:<br>PVQ-RR ST   | -.20     | .38            | -.53    | .60     |
| Condition SE:<br>PVQ-RR ST     | .18      | .43            | .43     | .67     |
| Condition ST:<br>PVQ-RR ST     | .32      | .43            | .76     | .45     |
| Condition OTC:<br>PVQ-RR ST    | -.35     | .48            | -.74    | .46     |

*Note.* CONS = conservation, SE = self-enhancement, ST = self-transcendence, OTC = openness to change

Table A3

*The Main and Interaction Effects of Condition and Personal Values on Positive Well-Being*

|                                | Estimate | Standard error | T value | P value |
|--------------------------------|----------|----------------|---------|---------|
| (Intercept)                    | 2.26     | 1.04           | 2.18    | .03*    |
| Condition CONS                 | 2.24     | 1.41           | 1.60    | .11     |
| Condition SE                   | .30      | 1.56           | .20     | .85     |
| Condition ST                   | .71      | 1.77           | .40     | .69     |
| Condition OTC                  | -1.08    | 1.50           | -.74    | .46     |
| PVQ-RR CONS                    | -.01     | .16            | -.05    | .96     |
| PVQ-RR OTC                     | .12      | .19            | .60     | .55     |
| PVQ-RR SE                      | -.04     | .13            | -.31    | .76     |
| PVQ-RR ST                      | .16      | .23            | .67     | .50     |
| Condition CONS:<br>PVQ-RR CONS | -.06     | .24            | -.25    | .81     |
| Condition SE:<br>PVQ-RR CONS   | .14      | .28            | .49     | .63     |
| Condition ST:<br>PVQ-RR CONS   | -.09     | .26            | -.35    | .73     |
| Condition OTC:<br>PVQ-RR CONS  | -.14     | .34            | -.41    | .68     |
| Condition CONS:<br>PVQ-RR OTC  | -.14     | .30            | -.47    | .64     |
| Condition SE:<br>PVQ-RR OTC    | -.10     | .28            | -.37    | .71     |
| Condition ST:<br>PVQ-RR OTC    | -.02     | .30            | -.06    | .96     |
| Condition OTC:<br>PVQ-RR OTC   | .21      | .32            | .66     | .51     |
| Condition CONS:<br>PVQ-RR SE   | .12      | .19            | .66     | .51     |
| Condition SE:<br>PVQ-RR SE     | .06      | .20            | .30     | .77     |
| Condition ST:<br>PVQ-RR SE     | -.10     | .22            | -.46    | .64     |
| Condition OTC:<br>PVQ-RR SE    | .18      | .26            | .71     | .48     |
| Condition CONS:<br>PVQ-RR ST   | -.40     | .32            | -1.24   | .22     |
| Condition SE:<br>PVQ-RR ST     | -.14     | .37            | -.37    | .71     |
| Condition ST:<br>PVQ-RR ST     | .04      | .36            | .11     | .92     |
| Condition OTC:<br>PVQ-RR ST    | -.01     | .41            | -.02    | .99     |

*Note.* CONS = conservation, SE = self-enhancement, ST = self-transcendence, OTC = openness to change



Table A4

*The Main and Interaction Effects of Condition and Personal Values on Meaning in Life Searching*

|                 | Estimate | Standard error | T value | P value |
|-----------------|----------|----------------|---------|---------|
| (Intercept)     | 3.75     | 1.83           | 2.05    | .04*    |
| Condition CONS  | -2.47    | 2.48           | -1.00   | .32     |
| Condition SE    | -.86     | 2.74           | -.31    | .75     |
| Condition ST    | 1.62     | 3.11           | .52     | .60     |
| Condition OTC   | -2.23    | 2.56           | -.87    | .38     |
| PVQ-RR CONS     | .15      | .28            | .52     | .60     |
| PVQ-RR OTC      | -.65     | .34            | -1.89   | .06     |
| PVQ-RR SE       | .27      | .22            | 1.20    | 0.23    |
| PVQ-RR ST       | .35      | .41            | .85     | .40     |
| Condition CONS: | .31      | .43            | .73     | .47     |
| PVQ-RR CONS     |          |                |         |         |
| Condition SE:   | .20      | .49            | .40     | .69     |
| PVQ-RR CONS     |          |                |         |         |
| Condition ST:   | .09      | .46            | .19     | .85     |
| PVQ-RR CONS     |          |                |         |         |
| Condition OTC:  | .52      | .60            | .88     | .38     |
| PVQ-RR CONS     |          |                |         |         |
| Condition CONS: | .87      | .52            | 1.67    | .10     |
| PVQ-RR OTC      |          |                |         |         |
| Condition SE:   | .89      | .49            | 1.80    | .07     |
| PVQ-RR OTC      |          |                |         |         |
| Condition ST:   | .78      | .53            | 1.45    | .15     |
| PVQ-RR OTC      |          |                |         |         |
| Condition OTC:  | .75      | .56            | 1.36    | .18     |
| PVQ-RR OTC      |          |                |         |         |
| Condition CONS: | .33      | .33            | 1.00    | .32     |
| PVQ-RR SE       |          |                |         |         |
| Condition SE:   | -.21     | .36            | -.56    | .55     |
| PVQ-RR SE       |          |                |         |         |
| Condition ST:   | -.21     | .38            | -.55    | .58     |
| PVQ-RR SE       |          |                |         |         |
| Condition OTC:  | .37      | .45            | .83     | .41     |
| PVQ-RR SE       |          |                |         |         |
| Condition CONS: | -.71     | .57            | -1.25   | .21     |
| PVQ-RR ST       |          |                |         |         |
| Condition SE:   | -.48     | .64            | -.75    | .45     |
| PVQ-RR ST       |          |                |         |         |
| Condition ST:   | -.86     | .63            | -1.36   | .18     |
| PVQ-RR ST       |          |                |         |         |
| Condition OTC:  | -.84     | .71            | -1.19   | .24     |
| PVQ-RR ST       |          |                |         |         |

*Note.* CONS = conservation, SE = self-enhancement, ST = self-transcendence, OTC = openness to change

Table A5

*The Main and Interaction Effects of Condition and Personal Values on Negative Affect*

|                                | Estimate | Standard error | T value | P value |
|--------------------------------|----------|----------------|---------|---------|
| (Intercept)                    | .65      | 1.07           | .60     | .55     |
| Condition CONS                 | 2.90     | 1.46           | 2.00    | .05*    |
| Condition SE                   | 2.05     | 1.61           | 1.28    | .20     |
| Condition ST                   | 2.77     | 1.83           | 1.52    | .13     |
| Condition OTC                  | 2.09     | 1.50           | 1.39    | .17     |
| PVQ-RR CONS                    | .09      | .16            | .53     | .60     |
| PVQ-RR OTC                     | .003     | .20            | .02     | .99     |
| PVQ-RR SE                      | .01      | .13            | .05     | .96     |
| PVQ-RR ST                      | .14      | .24            | .57     | .57     |
| Condition CONS:<br>PVQ-RR CONS | -.03     | .25            | -.12    | .91     |
| Condition SE:<br>PVQ-RR CONS   | -.49     | .29            | -1.69   | .09     |
| Condition ST:<br>PVQ-RR CONS   | -.25     | .27            | -.91    | .36     |
| Condition OTC:<br>PVQ-RR CONS  | .24      | .35            | .68     | .50     |
| Condition CONS:<br>PVQ-RR OTC  | -.55     | .31            | -1.80   | .07     |
| Condition SE:<br>PVQ-RR OTC    | -.04     | .29            | -.15    | .89     |
| Condition ST:<br>PVQ-RR OTC    | -.02     | .31            | -.05    | .96     |
| Condition OTC:<br>PVQ-RR OTC   | -.18     | .33            | -.56    | .58     |
| Condition CONS:<br>PVQ-RR SE   | .05      | .19            | .28     | .78     |
| Condition SE:<br>PVQ-RR SE     | .05      | .21            | .23     | .82     |
| Condition ST:<br>PVQ-RR SE     | .11      | .22            | .50     | .62     |
| Condition OTC:<br>PVQ-RR SE    | -.01     | .26            | -.04    | .97     |
| Condition CONS:<br>PVQ-RR ST   | -.04     | .33            | -.13    | .90     |
| Condition SE:<br>PVQ-RR ST     | -.01     | .38            | -.03    | .98     |
| Condition ST:<br>PVQ-RR ST     | -.40     | .37            | -1.06   | .29     |
| Condition OTC:<br>PVQ-RR ST    | -.43     | .42            | -1.04   | .30     |

*Note.* CONS = conservation, SE = self-enhancement, ST = self-transcendence, OTC = openness to change
